# Supplementary material for: Diarylethene-based conjugated polymer networks for ultrafast photochromic films
Source: Royal Society of Chemistry journal article supplement (doi:10.1039/c9nj02596k), 2019-01-01
Supplement: c9nj02596k1.pdf [file c9nj02596k1.pdf]

*Supporting Information for*

**Diarylethene-based conjugated polymer networks for ultrafast photochromic films**

*Qiu-Ting Fu,<sup>‡a</sup> Xiaodong Yan,<sup>‡a</sup> Tao Li,<sup>a</sup> Xin-Yue Zhang,<sup>a</sup> Yue He,<sup>a</sup> Wen-Da Zhang,<sup>a</sup> Yong Liu,<sup>a</sup> Yunxing Li,<sup>a</sup> and Zhi-Guo Gu<sup>\*a,b</sup>*

*<sup>a</sup> Key Laboratory of Synthetic and Biological Colloids, Ministry of Education, School of Chemical and Material Engineering, Jiangnan University, Wuxi 214122, China*

*<sup>b</sup> International Joint Research Center for Photoresponsive Molecules and Materials, School of Chemical and Material Engineering, Jiangnan University, Wuxi 214122, China*

*<sup>‡</sup> These authors contributed equally to this work.*

E-mail: zhiguogu@jiangnan.edu.cn

**Table of contents**

|                                                           |            |
|-----------------------------------------------------------|------------|
| <b>1. NMR and IR spectra of DEA-CHO and MC</b>            | <b>S2</b>  |
| <b>2. PXRD patterns</b>                                   | <b>S6</b>  |
| <b>3. N<sub>2</sub> adsorption/desorption isotherms</b>   | <b>S7</b>  |
| <b>4. TGA profiles</b>                                    | <b>S7</b>  |
| <b>5. Reaction conditions</b>                             | <b>S8</b>  |
| <b>6. Stability in 6 M HCl and NaOH solution</b>          | <b>S9</b>  |
| <b>7. UV-vis-NIR absorption spectra of DEA-CHO and MC</b> | <b>S10</b> |
| <b>8. XPS spectra</b>                                     | <b>S12</b> |
| <b>9. UV-vis-NIR absorption spectrum of PMMA</b>          | <b>S13</b> |
| <b>10. Single-crystal diffraction data</b>                | <b>S14</b> |

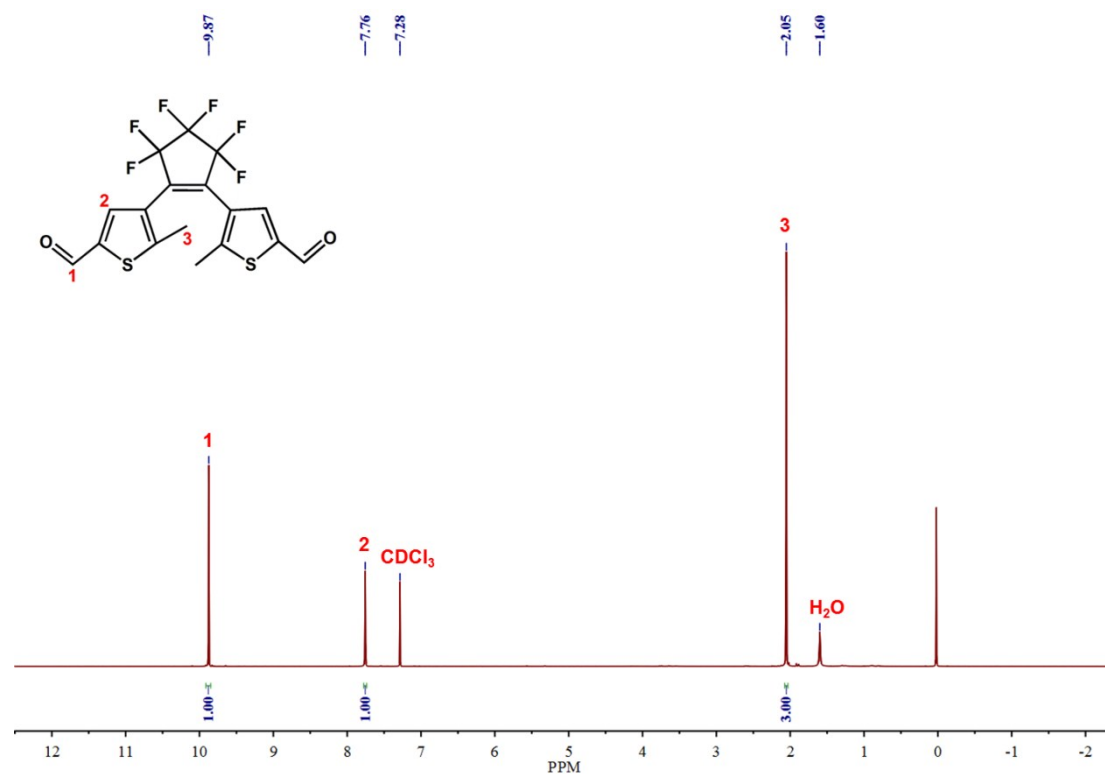

**Fig. S1** <sup>1</sup>H NMR spectrum of DEA-CHO.

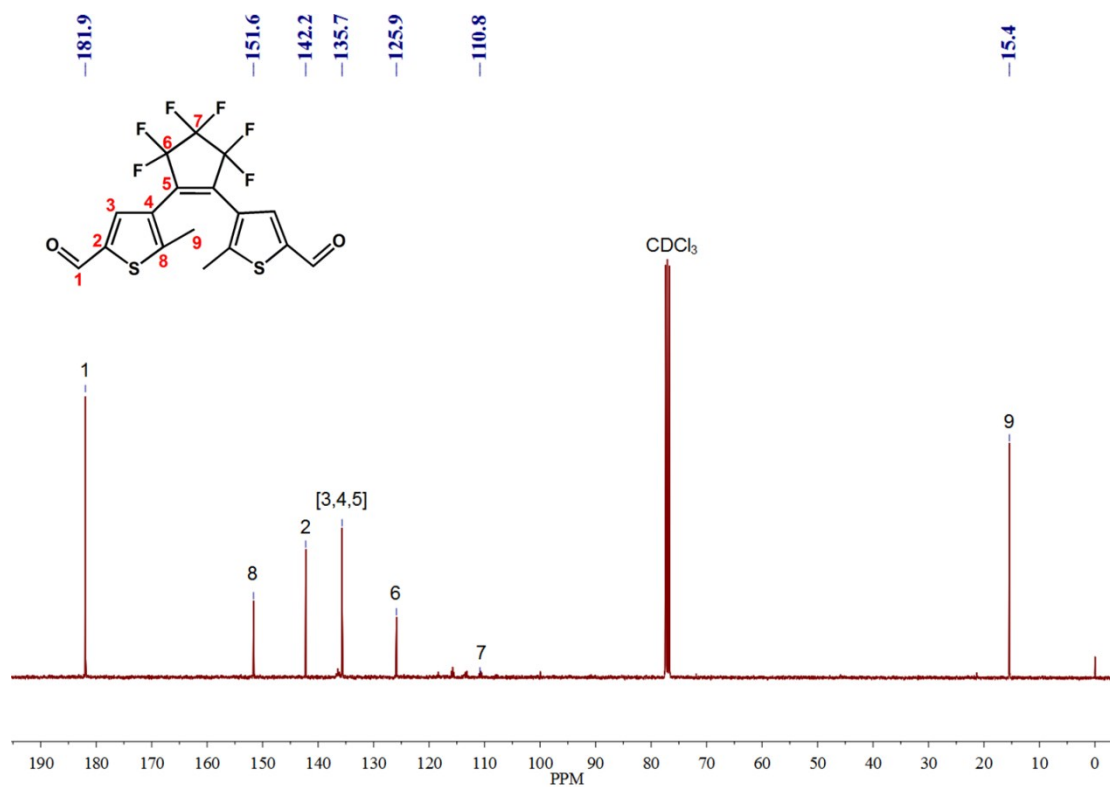

**Fig. S2** <sup>13</sup>C NMR spectrum of DEA-CHO.

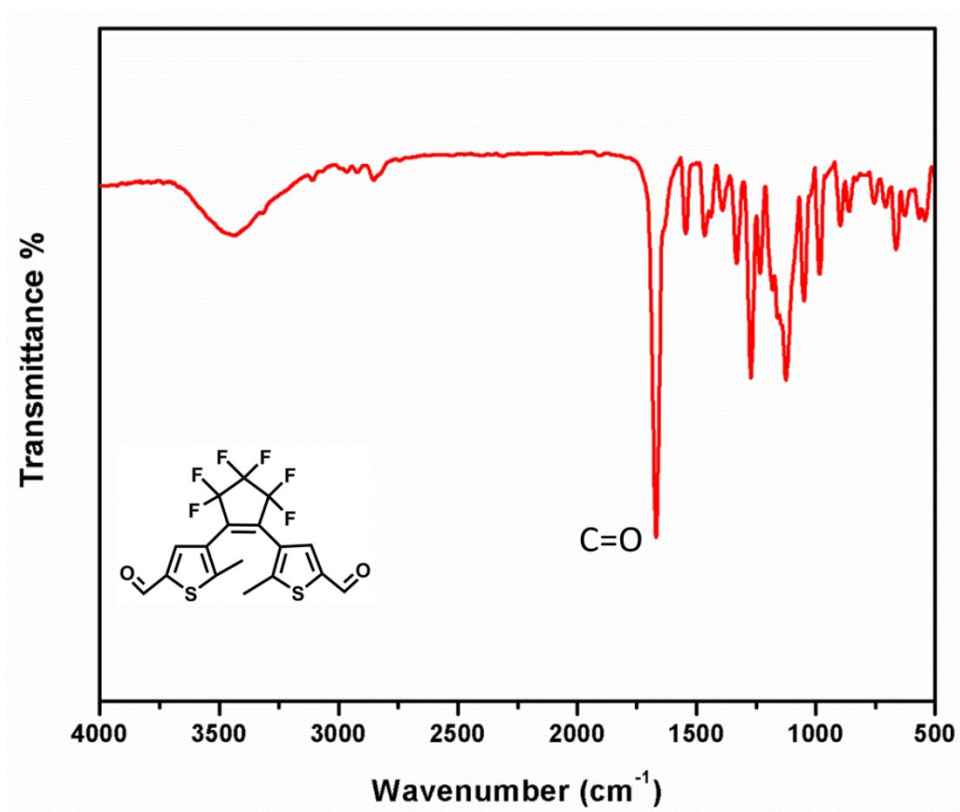

**Fig. S3** FT-IR spectrum of DEA-CHO.

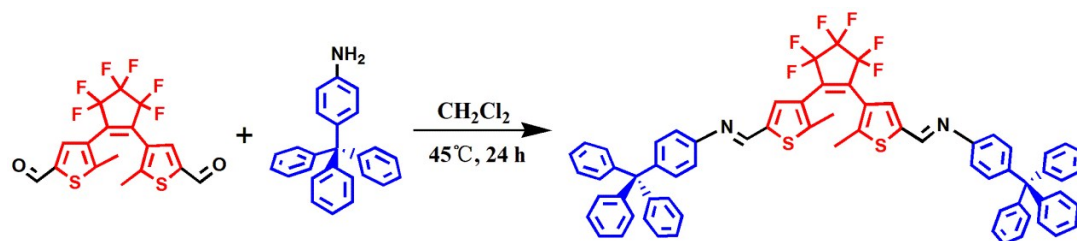

**Fig. S4** Synthesis of MC.

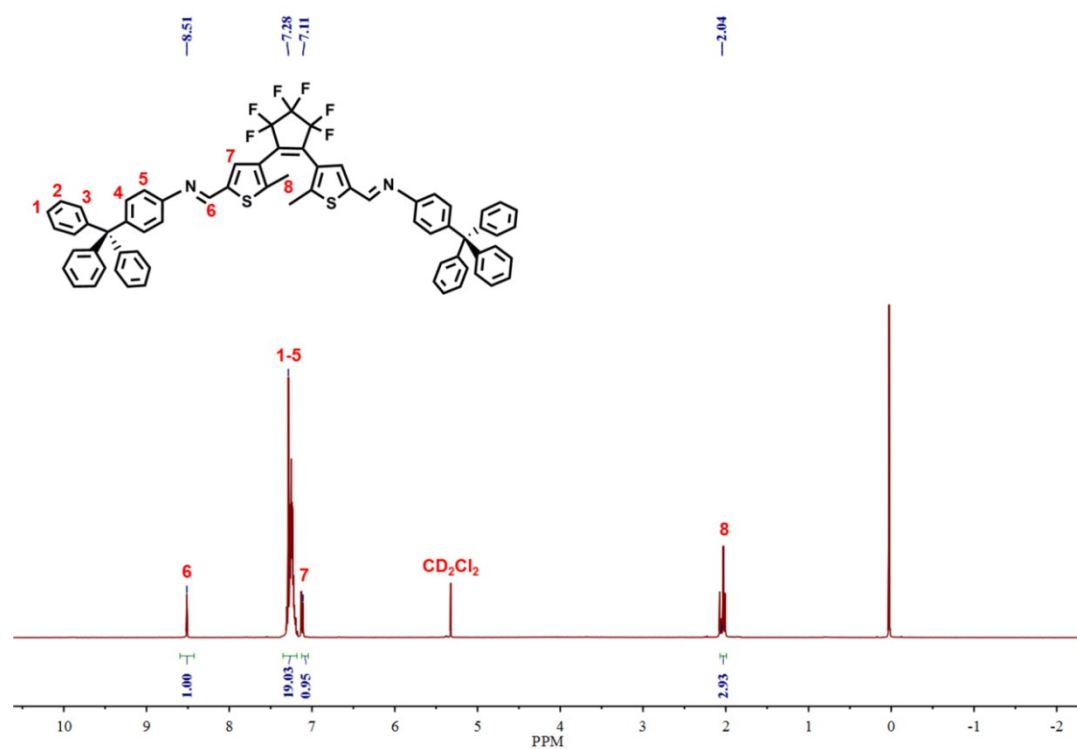

**Fig. S5**  $^1\text{H}$  NMR spectrum of MC.

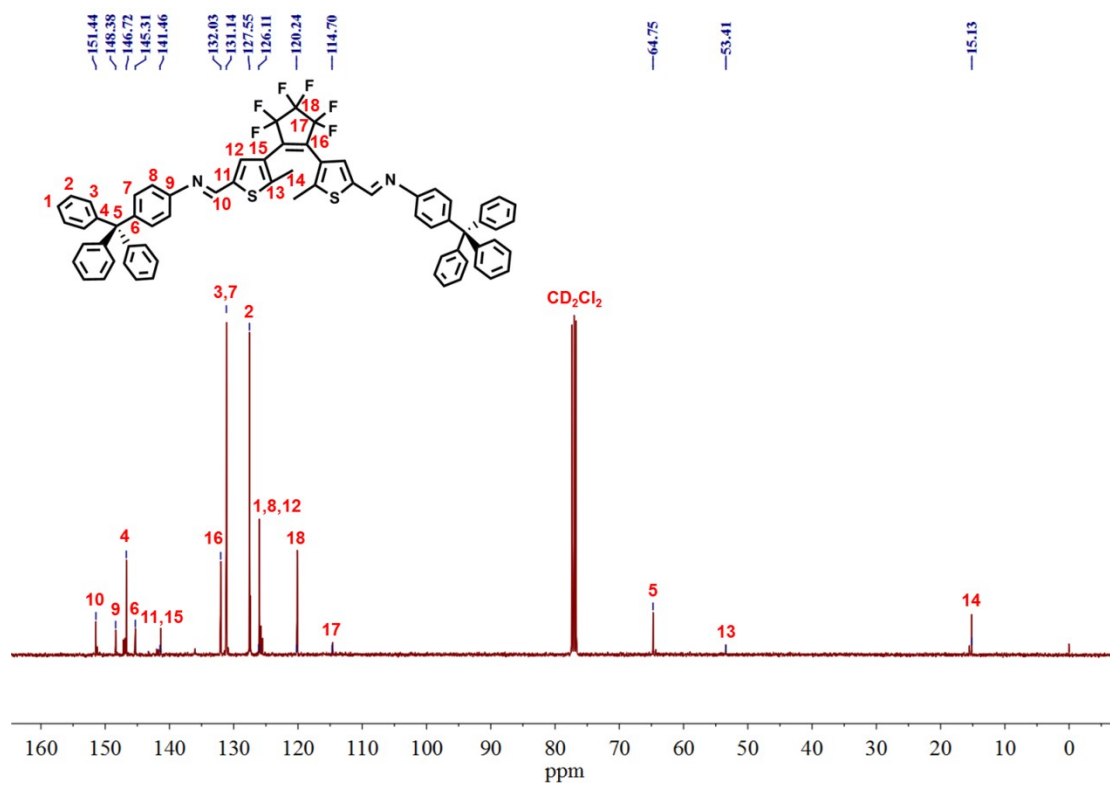

Fig. S6 <sup>13</sup>C NMR spectrum of MC.

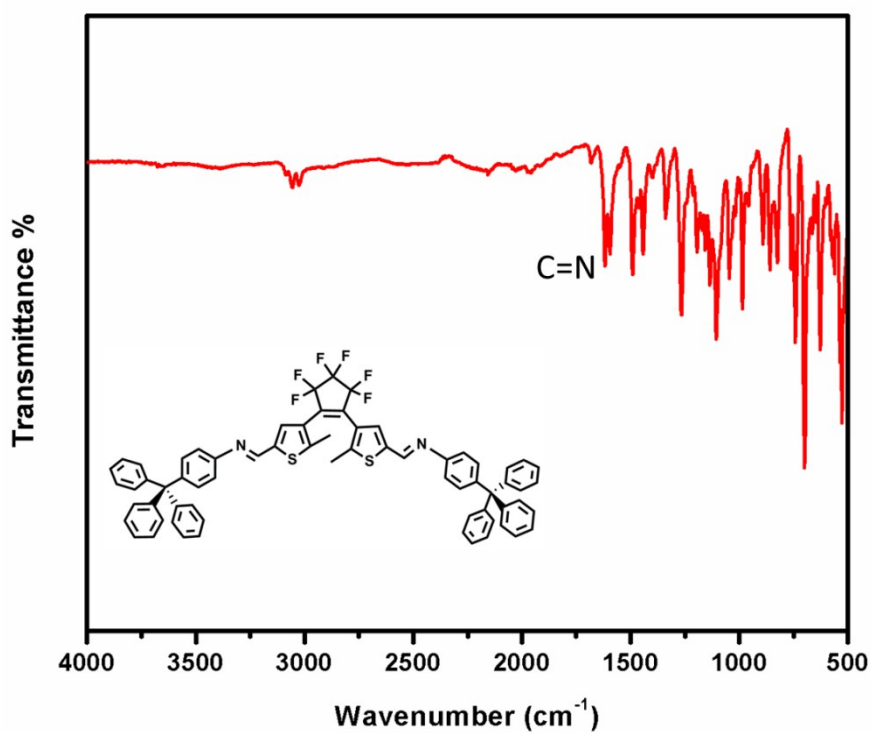

Fig. S7 FT-IR spectrum of MC.

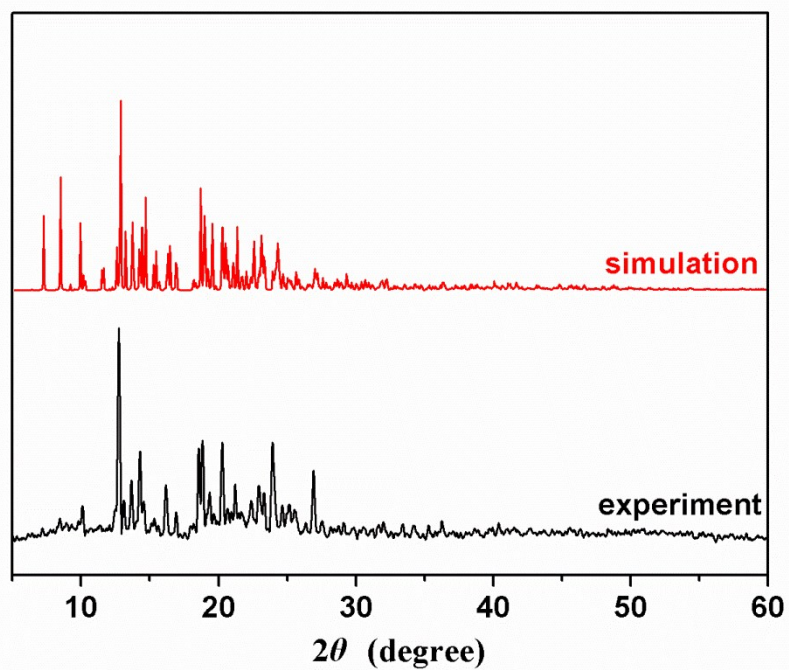

**Fig. S8** Powder X-ray diffraction (PXRD) patterns of MC.

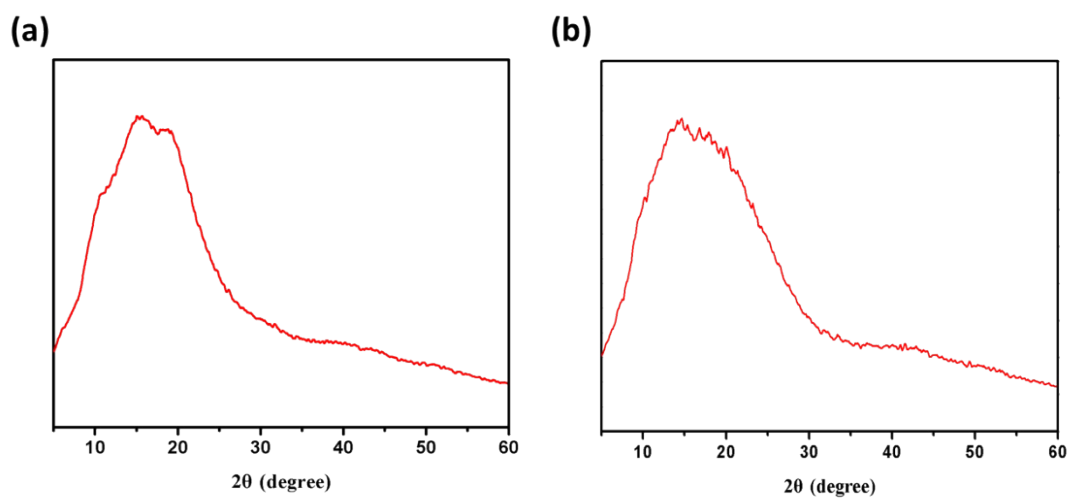

**Fig. S9** PXRD patterns of (a) DPP-1 and (b) DPP-2.

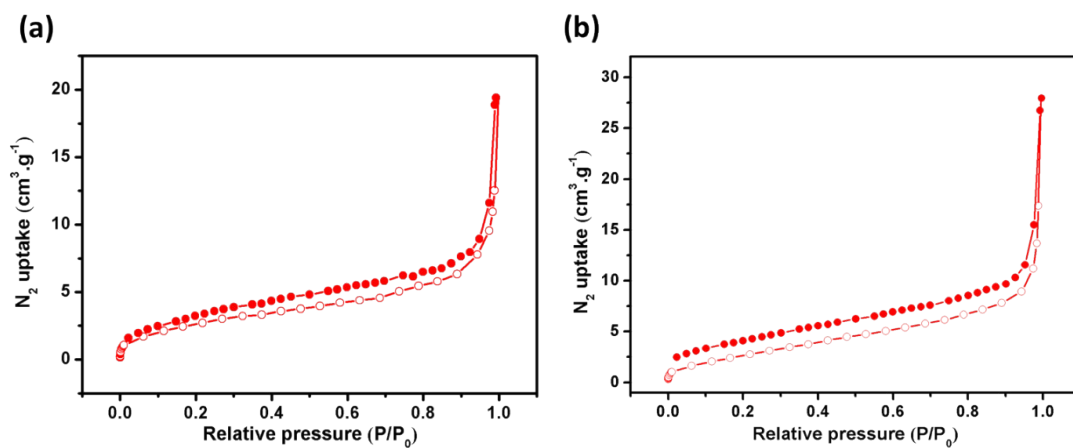

Fig. S10 N<sub>2</sub> adsorption/desorption isotherms of (a) DPP-1 and (b) DPP-2.

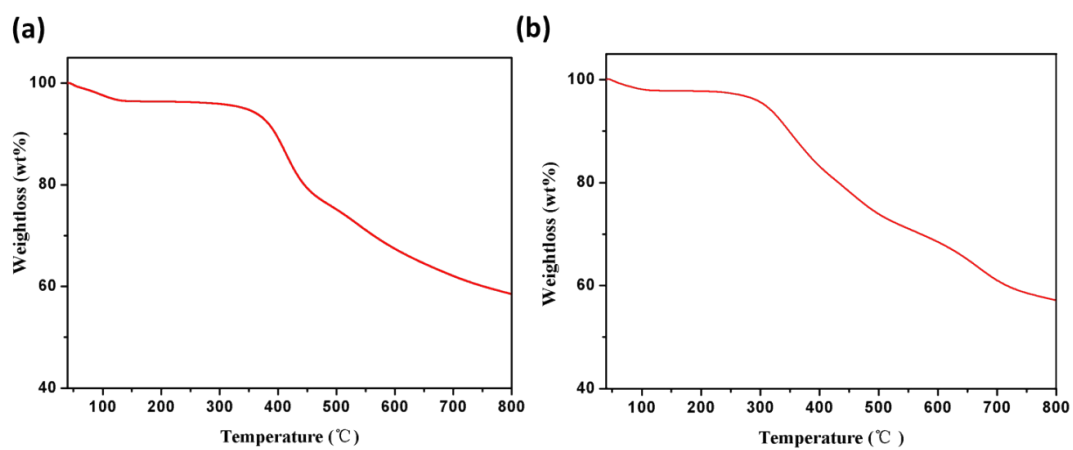

Fig. S11 TGA profiles of (a) DPP-1 and (b) DPP-2 under N<sub>2</sub> atmosphere.

**Table S1** Screening of synthesis conditions of **DPP-1** and **DPP-2**.

| Entry | Solvent combination and ratio | Catalyst                                | Temperature (°C) | Reaction time (days) | XRD results |
|-------|-------------------------------|-----------------------------------------|------------------|----------------------|-------------|
| 1     | Mesitylene/Dioxane=10:0~0:10  | 3~6 M HOAc<br>or 0.06-0.15<br>mmol TsOH | 120~180          | 5~7                  | amorphous   |
| 2     | Mesitylene/EtOH=10:0~0:10     | 3~6 M HOAc<br>or 0.06-0.15<br>mmol TsOH | 120~180          | 5~7                  | amorphous   |
| 3     | Mesitylene/MeOH=10:0~0:10     | 3~6 M HOAc<br>or 0.06-0.15<br>mmol TsOH | 120~180          | 5~7                  | amorphous   |
| 4     | Mesitylene/o-DCB=10:0~0:10    | 3~6 M HOAc<br>or 0.06-0.15<br>mmol TsOH | 120~180          | 5~7                  | amorphous   |
| 5     | o-DCB/BuOH=10:0~0:10          | 3~6 M HOAc<br>or 0.06-0.15<br>mmol TsOH | 120~180          | 5~7                  | amorphous   |
| 6     | o-DCB/EtOH=10:0~0:10          | 3~6 M HOAc<br>or 0.06-0.15<br>mmol TsOH | 120~180          | 5~7                  | amorphous   |
| 7     | DMAC/Mesitylene=10:0~0:10     | 3~6 M HOAc<br>or 0.06-0.15<br>mmol TsOH | 120~180          | 5~7                  | amorphous   |
| 8     | DMAC/Dioxane=10:0~0:10        | 3~6 M HOAc<br>or 0.06-0.15<br>mmol TsOH | 120~180          | 5~7                  | amorphous   |
| 9     | DMAC/o-DCB=10:0~0:10          | 3~6 M HOAc<br>or 0.06-0.15<br>mmol TsOH | 120~180          | 5~7                  | amorphous   |

We have made a lot of efforts to test a series of reaction conditions through controlling the solvents composition and ratio range, catalyst, reaction temperature and reaction time. Detailed conditions are as follows. The total amount of solvent was 2 mL, and solvent ratio included 10:0, 9:1, 7:1, 5:1, 3:1, 1:1, 1:3, 1:5, 1:7, 1:9, 0:10. For catalyst, the total amount of HOAc catalyst was 0.2 mL, and concentration included 3, 4, 5, 6 M; the amount of TsOH included 0.06, 0.09, 0.12, 0.15 mmol. Temperature included 120, 140, 160, 180 °C. Reaction time included 5, 6, 7 days. However, the experiment results were disappointing, and the products checked by the XRD all shown amorphous structure. The screening of the reaction conditions was based on whether the product could undergo photochromism and photochromic properties. For **DPP-1**, the optimum reaction conditions were mesitylene/dioxane = 5:1, 3 M HOAc, 120 °C for 5 days. For **DPP-2**, the optimum reaction conditions were o-DCB/EtOH = 1:3, 0.12 mmol TsOH, 120 °C for 5 days.



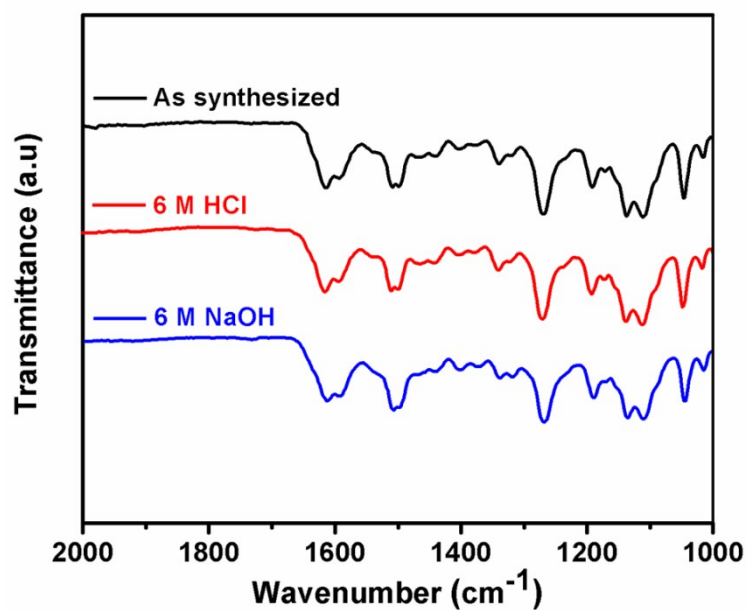

**Fig. S12** FT-IR spectra of **DPP-1**: pristine (black); treated in 6 M HCl solution for 5 days (red); treated in 6 M NaOH solution for 5 days (blue).

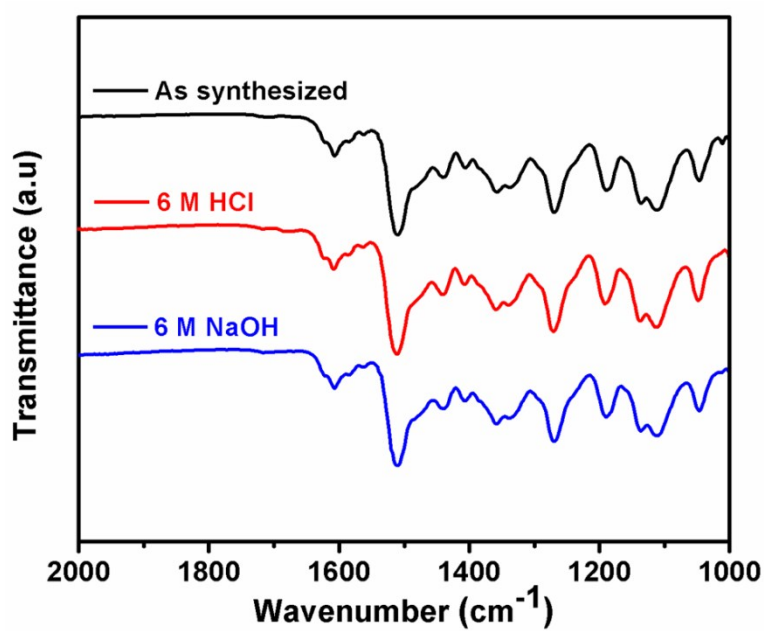

**Fig. S13** FT-IR spectra of **DPP-2**: pristine (black); treated in 6 M HCl solution for 5 days (red); treated in 6 M NaOH solution for 5 days (blue).

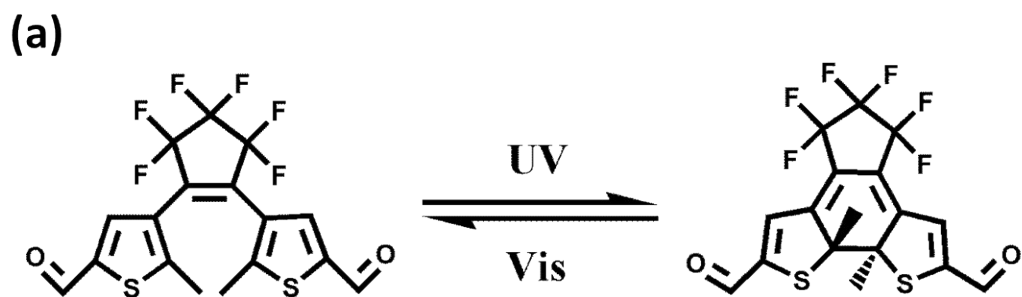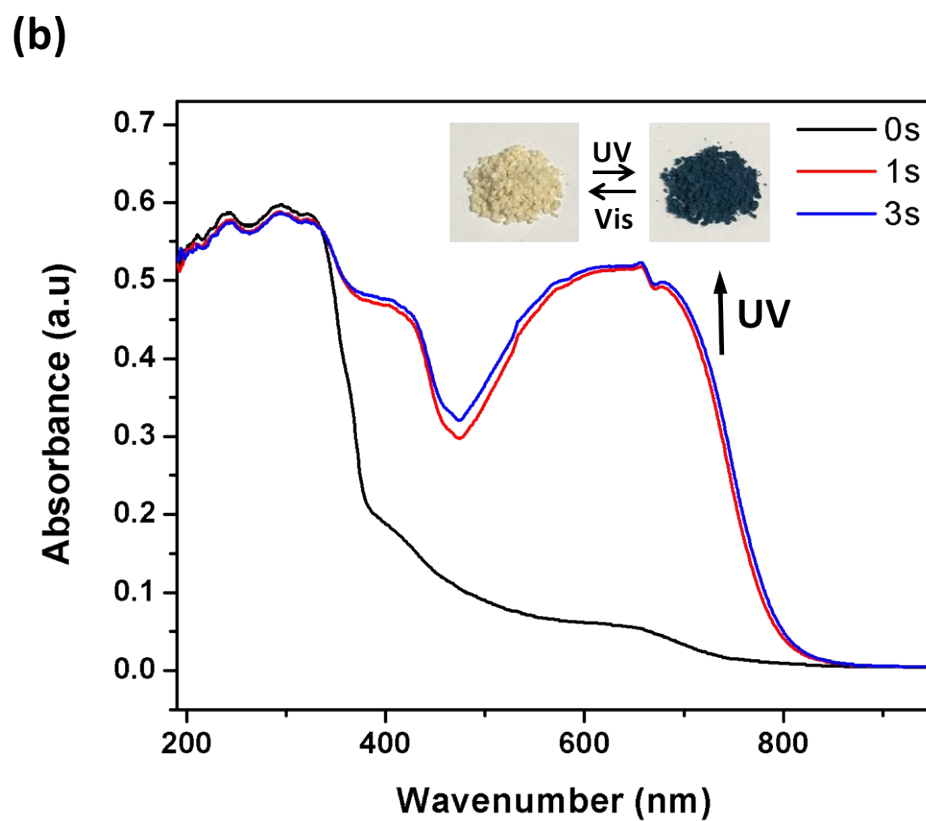

**Fig. S14** (a) Molecular structures of the open and closed forms of DEA-CHO. (b) Time-dependent UV-vis-NIR absorption spectra of DEA-CHO upon irradiation with UV light ( $\lambda = 365$  nm).

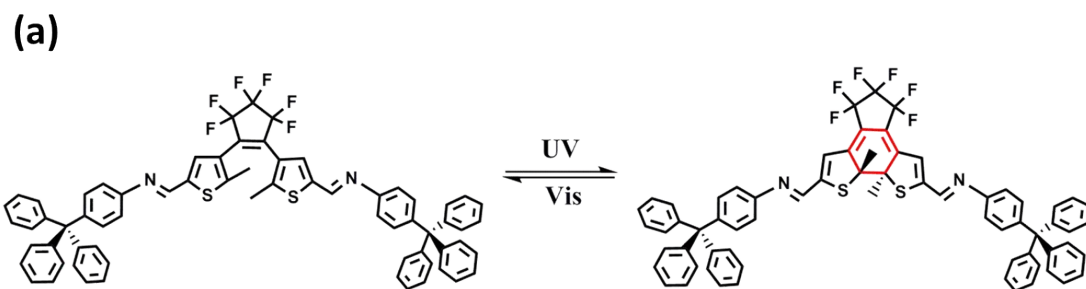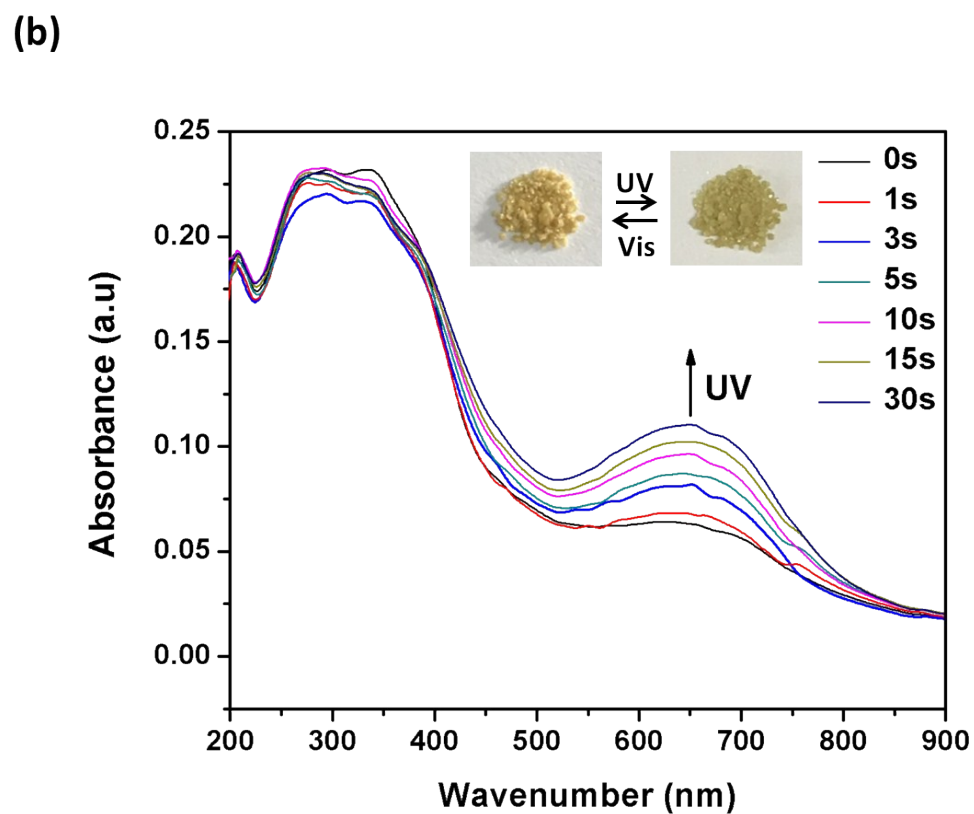

**Fig. S15** (a) Molecular structures of the open and closed forms of MC. (b) Time-dependent UV-vis-NIR absorption spectra of MC upon irradiation with UV light ( $\lambda = 365$  nm).

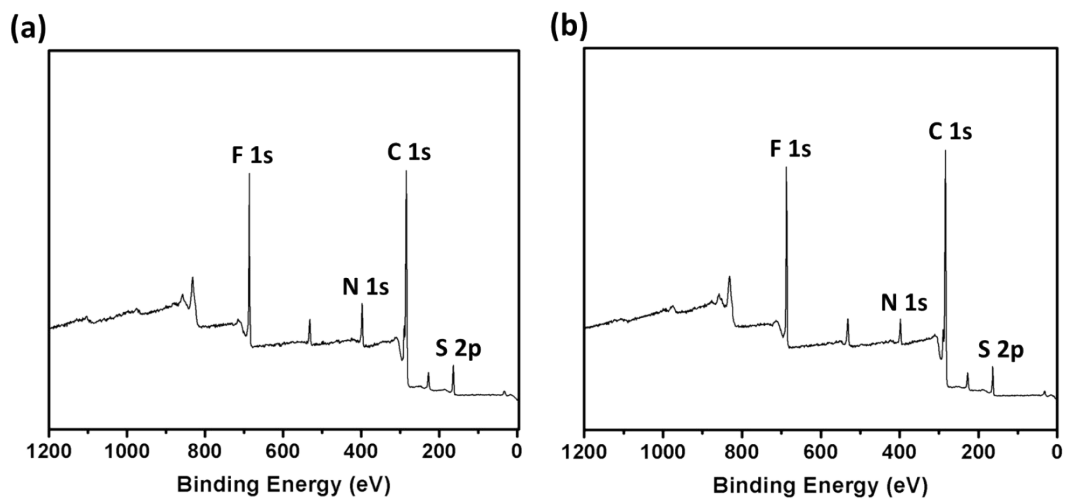

**Fig. S16** (a) XPS survey spectrum of **DPP-1**. (b) XPS survey spectrum of **DPP-2**.

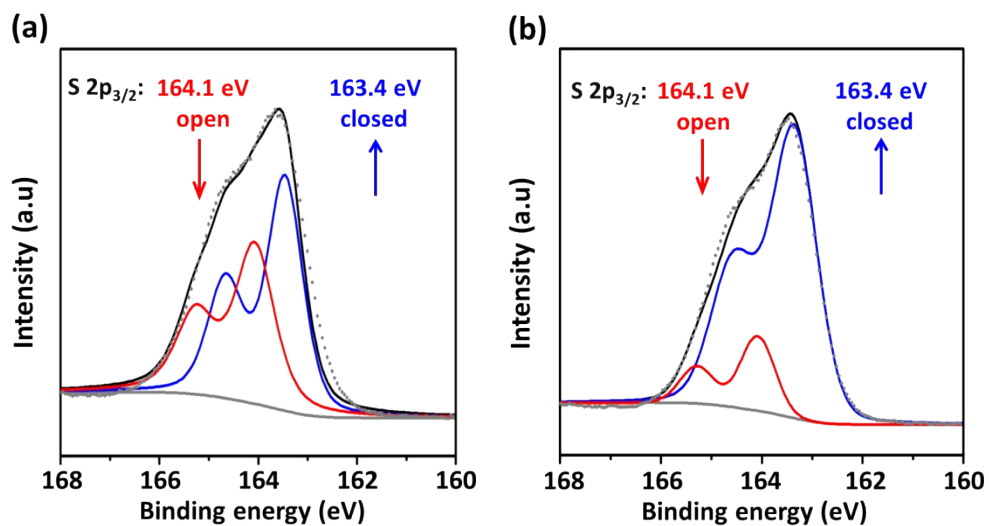

**Fig. S17** S 2p XPS spectrum of **DPP-2** before (a) and after (b) UV irradiation at 365 nm for 5 min.

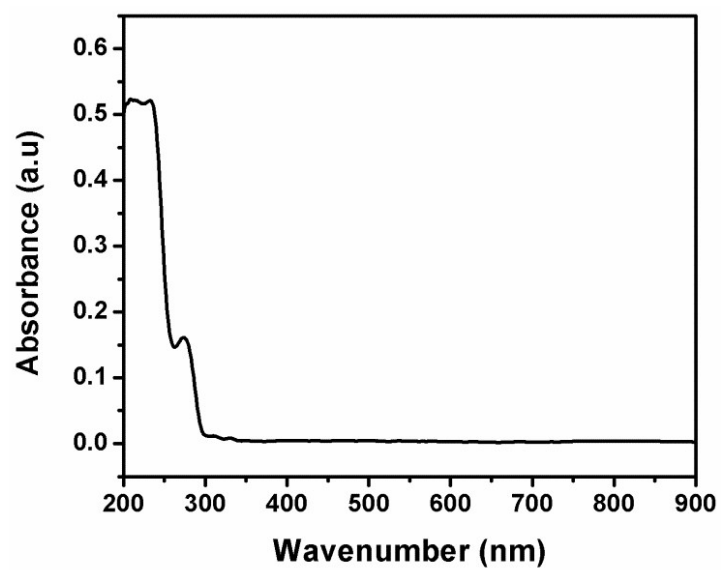

**Fig. S18** UV-vis-NIR absorption spectrum of PMMA.

**Table S2** Summary of crystallographic data for DEA-CHO and MC.

|                                                                                                                            | DEA-CHO                                                                      | MC                                                                                                                                 |
|----------------------------------------------------------------------------------------------------------------------------|------------------------------------------------------------------------------|------------------------------------------------------------------------------------------------------------------------------------|
| Formula                                                                                                                    | C <sub>17</sub> H <sub>10</sub> F <sub>6</sub> O <sub>2</sub> S <sub>2</sub> | C <sub>67</sub> H <sub>48</sub> C <sub>10</sub> F <sub>6</sub> N <sub>2</sub> S <sub>2</sub> ·0.5(C <sub>4</sub> H <sub>8</sub> O) |
| Fw                                                                                                                         | 424.37                                                                       | 1095.24                                                                                                                            |
| <i>T</i> (K)                                                                                                               | 153                                                                          | 173                                                                                                                                |
| $\lambda$ (Å)                                                                                                              | 0.71073                                                                      | 0.71073                                                                                                                            |
| Crystal system                                                                                                             | orthorhombic                                                                 | monoclinic                                                                                                                         |
| Space group                                                                                                                | <i>Pbcn</i>                                                                  | <i>C2/c</i>                                                                                                                        |
| <i>a</i> (Å)                                                                                                               | 12.065(3)                                                                    | 39.4752(11)                                                                                                                        |
| <i>b</i> (Å)                                                                                                               | 8.649(2)                                                                     | 9.6754(3)                                                                                                                          |
| <i>c</i> (Å)                                                                                                               | 16.450(4)                                                                    | 28.3165(9)                                                                                                                         |
| $\alpha$ (°)                                                                                                               | 90                                                                           | 90                                                                                                                                 |
| $\beta$ (°)                                                                                                                | 90                                                                           | 99.622(3)                                                                                                                          |
| $\gamma$ (°)                                                                                                               | 90                                                                           | 90                                                                                                                                 |
| <i>V</i> (Å <sup>3</sup> )                                                                                                 | 1716.6(7)                                                                    | 10663.0(6)                                                                                                                         |
| <i>Z</i>                                                                                                                   | 4                                                                            | 8                                                                                                                                  |
| <i>D</i> <sub>calc</sub> (g/cm <sup>3</sup> )                                                                              | 1.642                                                                        | 1.364                                                                                                                              |
| $\mu$ (mm <sup>-1</sup> )                                                                                                  | 0.382                                                                        | 0.169                                                                                                                              |
| <i>F</i> (000)                                                                                                             | 856                                                                          | 4560                                                                                                                               |
| $\theta$ (°)                                                                                                               | 2.5-25.5                                                                     | 2.3-27.0                                                                                                                           |
| index ranges                                                                                                               | -10 ≤ <i>h</i> ≤ 14                                                          | -50 ≤ <i>h</i> ≤ 47                                                                                                                |
|                                                                                                                            | -10 ≤ <i>k</i> ≤ 10                                                          | -12 ≤ <i>k</i> ≤ 12                                                                                                                |
|                                                                                                                            | -19 ≤ <i>l</i> ≤ 12                                                          | -34 ≤ <i>l</i> ≤ 36                                                                                                                |
| reflections collected                                                                                                      | 7129                                                                         | 53316                                                                                                                              |
| GOF ( <i>F</i> <sup>2</sup> )                                                                                              | 1.034                                                                        | 1.079                                                                                                                              |
| <i>R</i> <sub><i>I</i></sub> <sup><i>a</i></sup> , <i>wR</i> <sub>2</sub> <sup><i>b</i></sup> ( <i>I</i> > 2σ( <i>I</i> )) | 0.0352, 0.0720                                                               | 0.0531, 0.1526                                                                                                                     |
| <i>R</i> <sub><i>I</i></sub> <sup><i>a</i></sup> , <i>wR</i> <sub>2</sub> <sup><i>b</i></sup> (all data)                   | 0.0620, 0.0823                                                               | 0.0708, 0.1623                                                                                                                     |

$$R_I^a = \frac{\sum ||F_o| - |F_c||}{\sum F_o}, \quad wR_2^b = [\frac{\sum w(F_o^2 - F_c^2)^2}{\sum w(F_o^2)}]^{1/2}$$

**Table S3** Selected bond lengths [ $\text{\AA}$ ] and angles [ $^\circ$ ] for DEA-CHO and MC.

| DEA-CHO |           |         |          |
|---------|-----------|---------|----------|
| S1-C5   | 1.721(3)  | C4-C7   | 1.468(3) |
| S1-C8   | 1.717(2)  | C4-C4_a | 1.348(4) |
| F1-C1   | 1.341(9)  | C5-C6   | 1.365(3) |
| F2-C1   | 1.357(9)  | C5-C9   | 1.453(3) |
| F3-C2   | 1.348(7)  | C6-C7   | 1.418(3) |
| F4-C2   | 1.339(10) | C7-C8   | 1.383(3) |
| F5-C3   | 1.358(9)  | C8-C10  | 1.496(3) |
| F6-C3   | 1.356(8)  | C1-C4_a | 1.527(7) |
| O1-C9   | 1.211(3)  | C2-C3   | 1.533(9) |
| C1-C2   | 1.536(9)  | C3-C4   | 1.482(7) |
| MC      |           |         |          |
| S1-C6   | 1.721(2)  | C1-C2   | 1.342(3) |
| S1-C9   | 1.715(2)  | C2-C3   | 1.501(3) |
| S2-C37  | 1.720(2)  | C3-C4   | 1.541(4) |
| S2-C40  | 1.717(2)  | C4-C5   | 1.531(4) |
| F1-C3   | 1.348(4)  | C6-C7   | 1.363(3) |
| F2-C3   | 1.351(4)  | C7-C8   | 1.431(3) |
| F3-C4   | 1.332(5)  | C8-C9   | 1.370(3) |
| F4-C4   | 1.338(4)  | C11-C12 | 1.386(3) |
| F5-C5   | 1.349(4)  | C12-C13 | 1.384(3) |
| F6-C5   | 1.370(4)  | C13-C14 | 1.401(3) |
| N1-C10  | 1.263(3)  | C14-C17 | 1.549(2) |
| N1-C11  | 1.425(2)  | C17-C24 | 1.549(2) |

Symmetry transformations used to generate equivalent atoms for DEA-CHO: a = 1-x, y, 3/2-z.
